# Supplementary material for: Catalytic Conversion of Jatropha curcas Oil to Biodiesel Using Mussel Shell-Derived Catalyst: Characterization, Stability, and Comparative Study
Source: MDPI journal article supplement (doi:10.3390/inorganics12040109), 2024-04-08
Supplement: s1 [file s1]

## Supplementary Figures

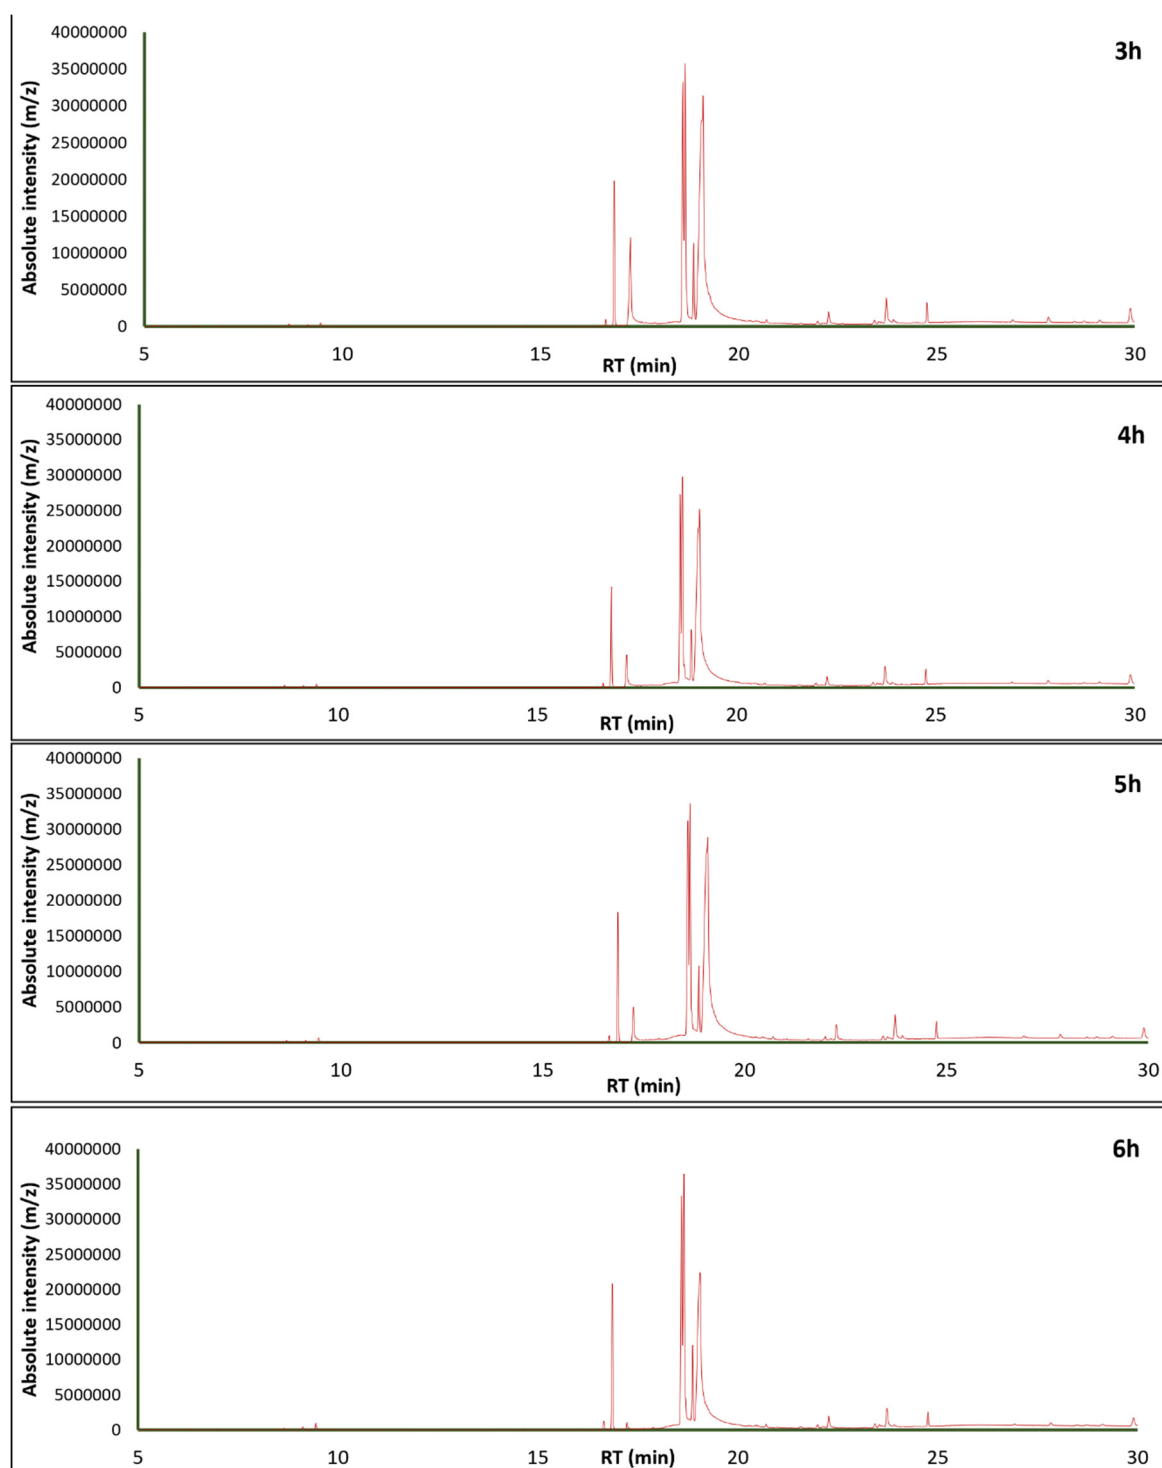

Figure S1. GC-MS spectra of JCME at different reaction times.

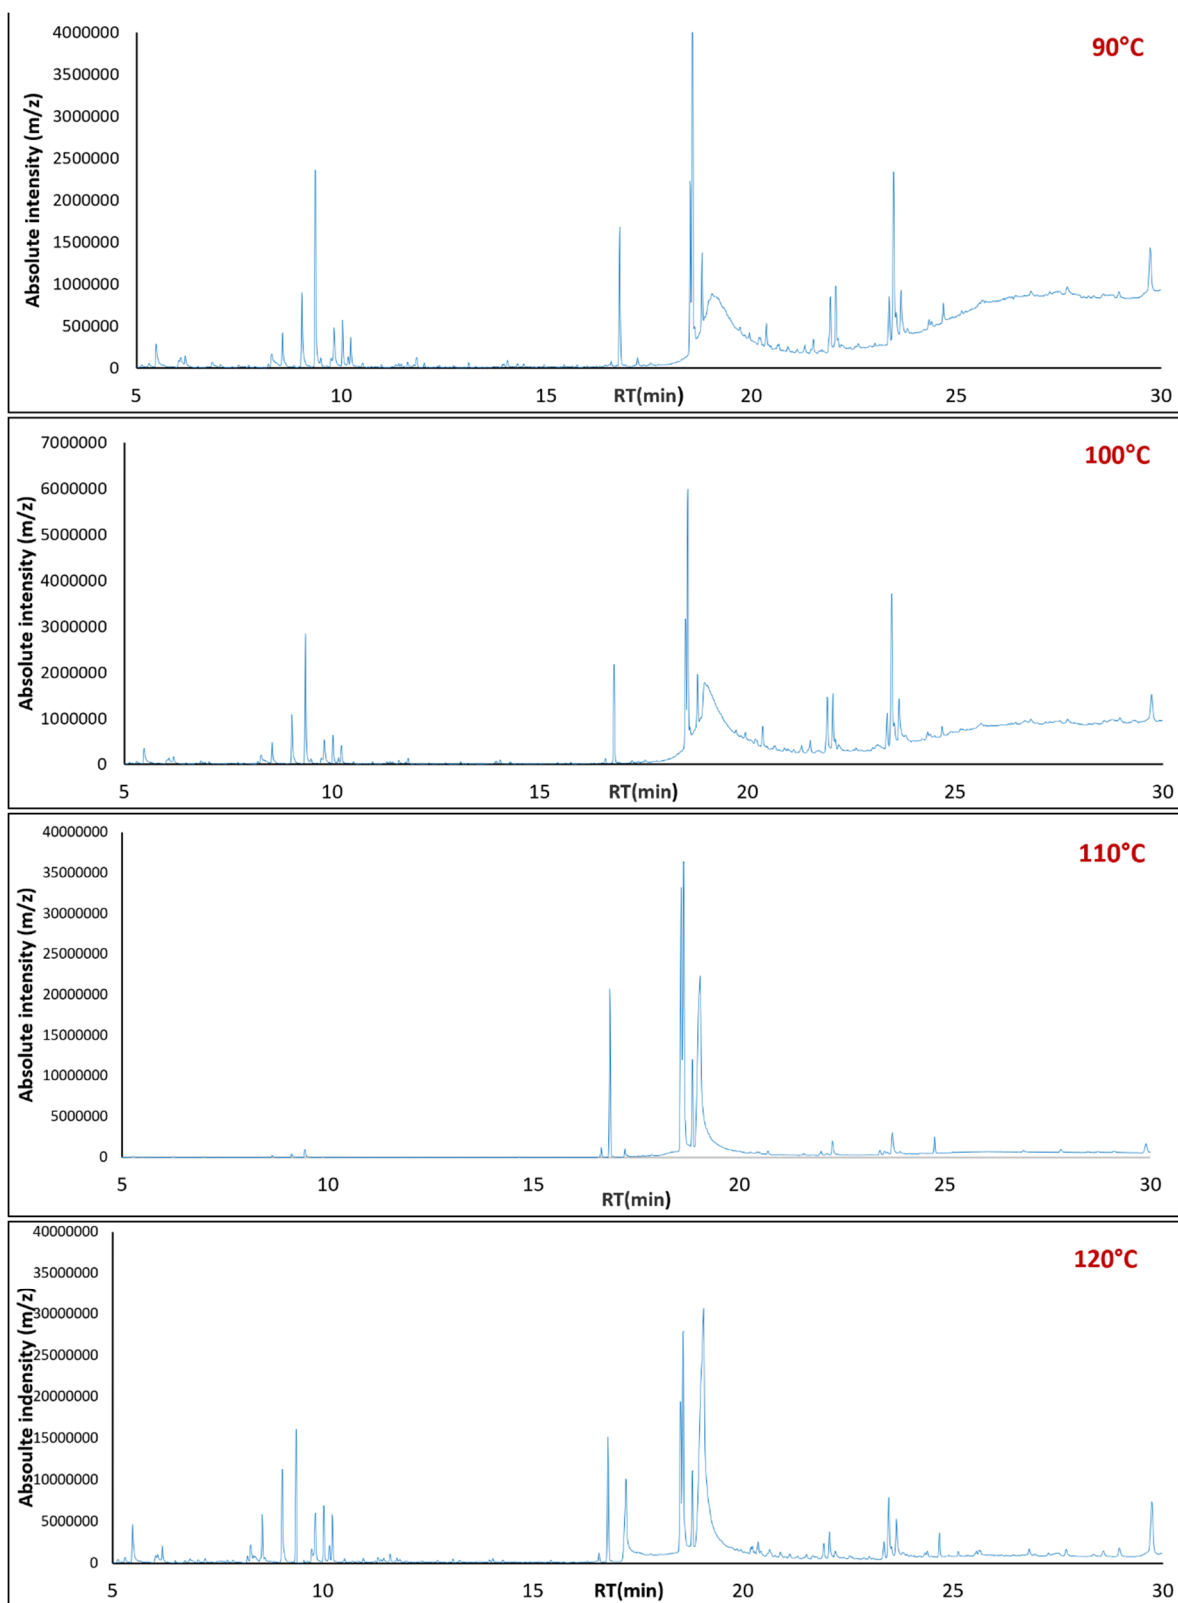

Figure S2. The GC-MS spectra of JCME in different reaction temperatures.

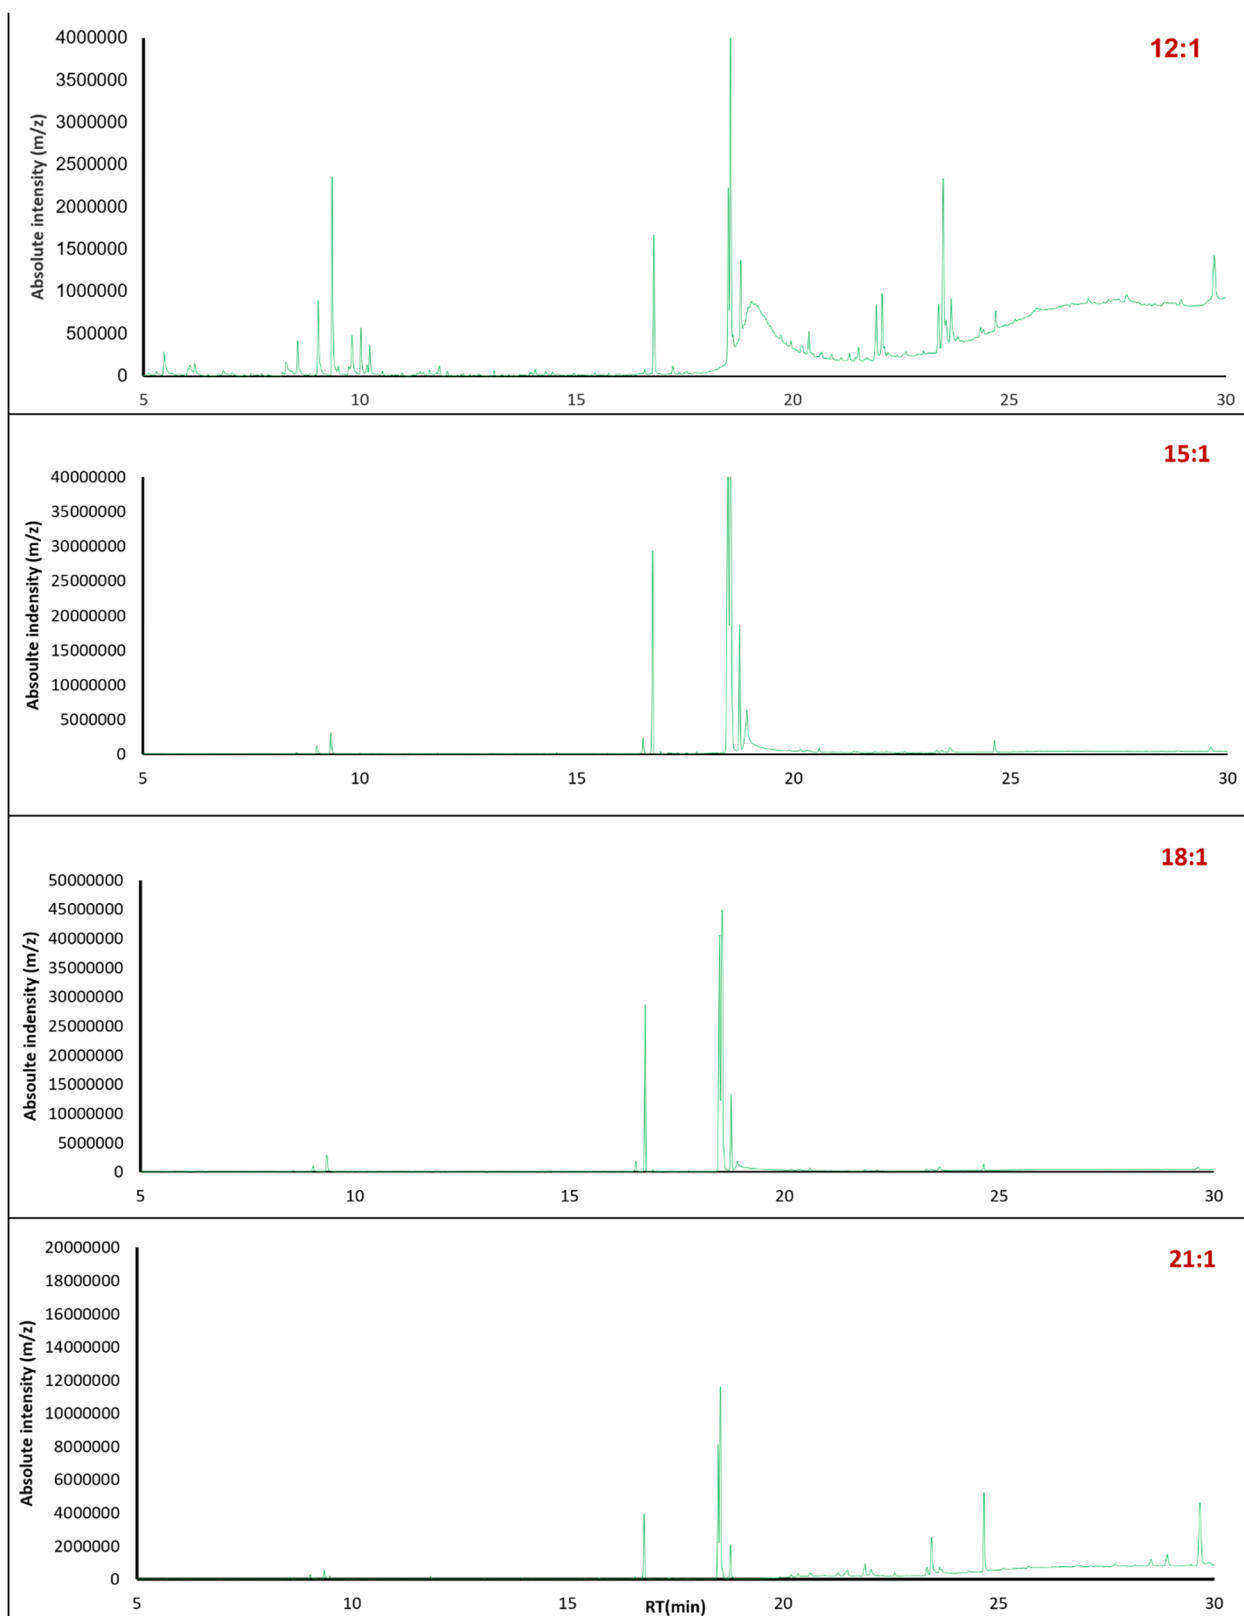

Figure S3. The GC-MS spectra of JCME in different methanol to oil ratio.

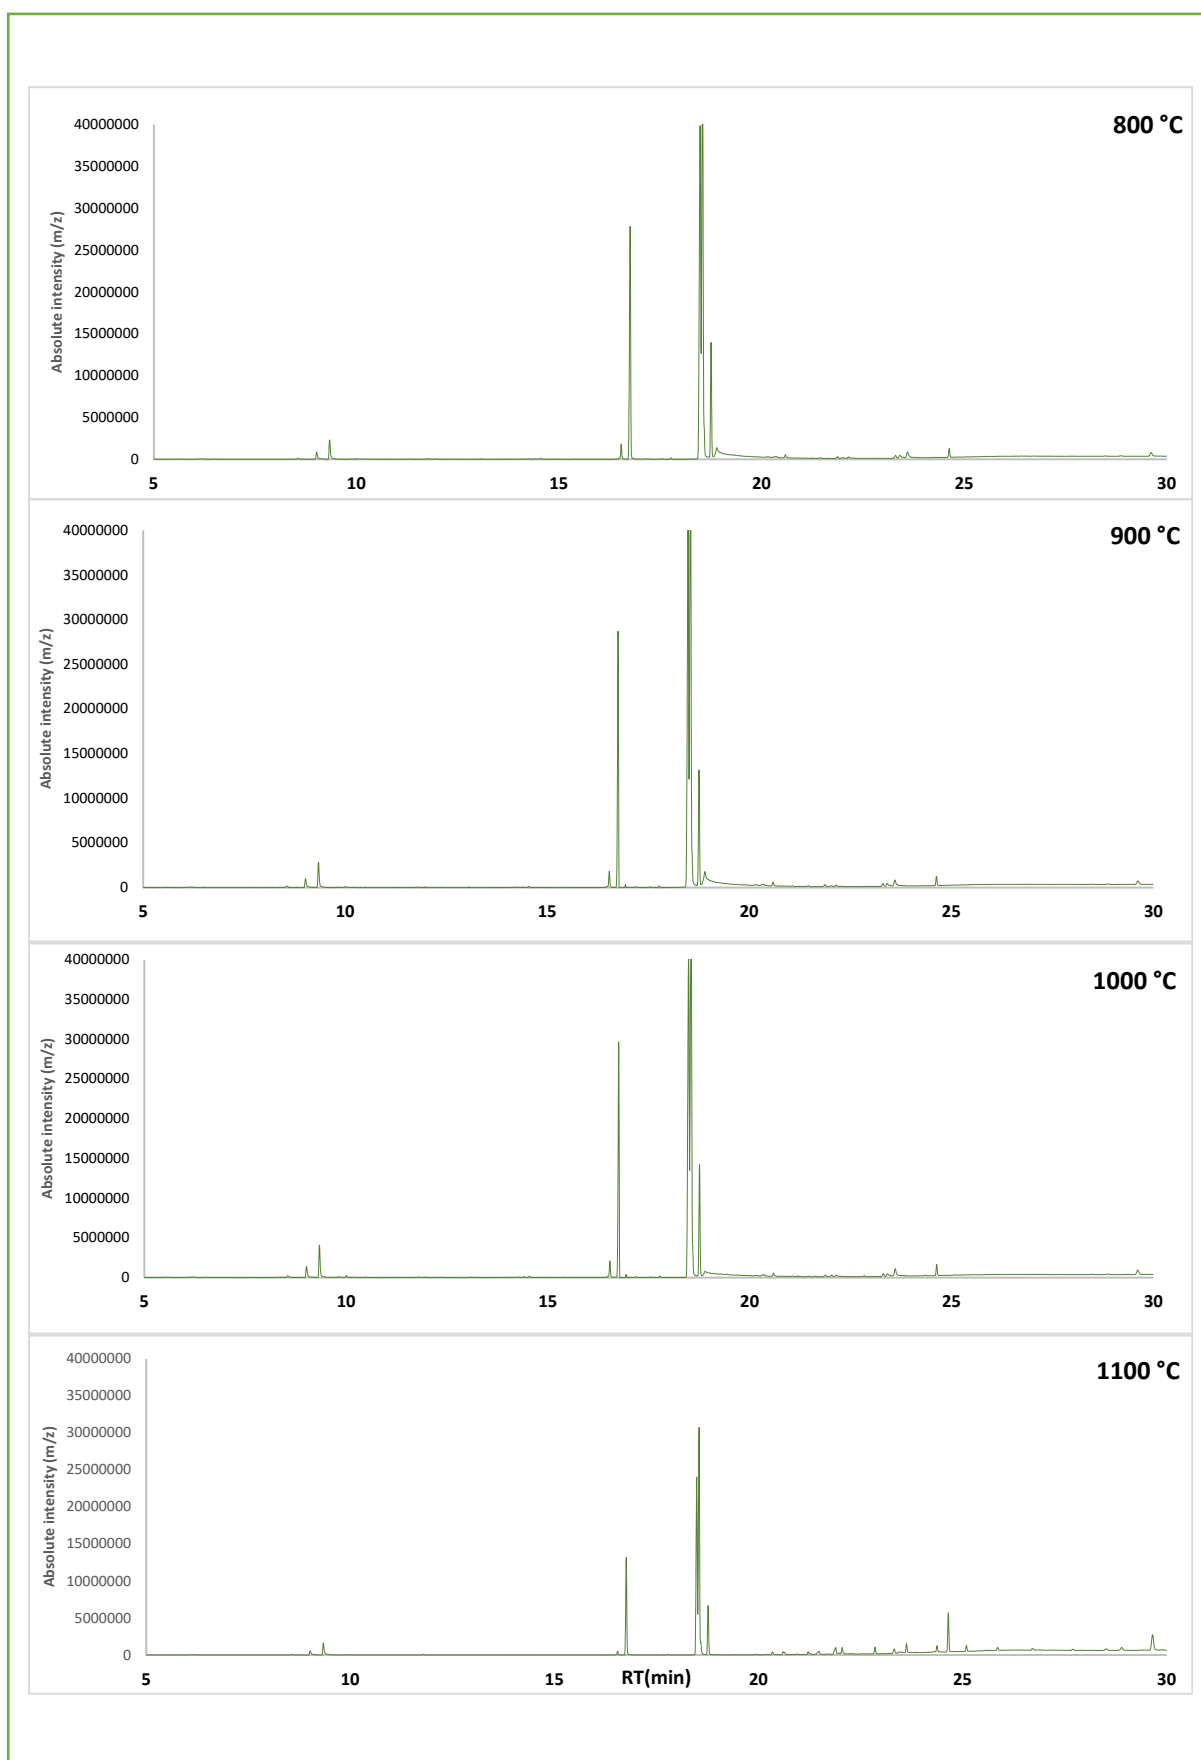

**Figure S4.** The GC-MS spectra of JCME at different calcined catalyst temperature.

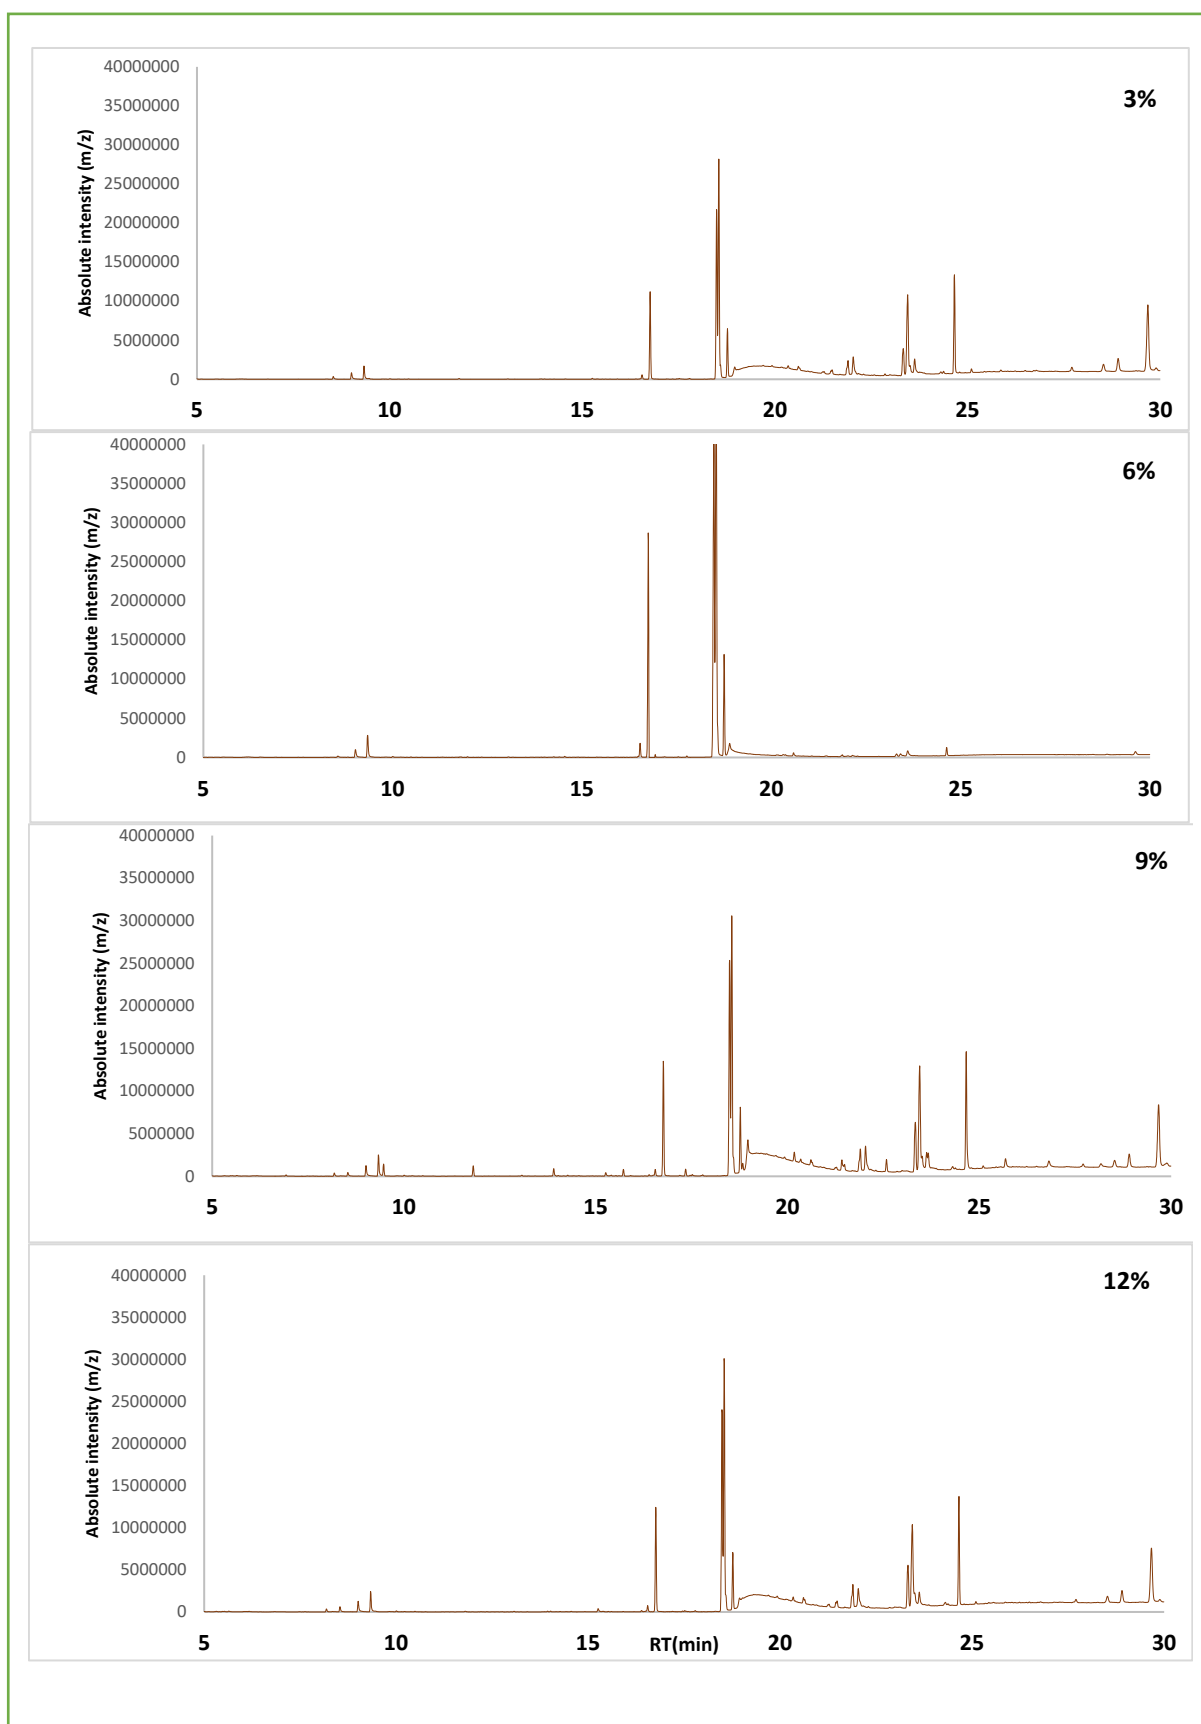

**Figure S5.** The GC–MS spectra of JCME in different catalyst concentration.

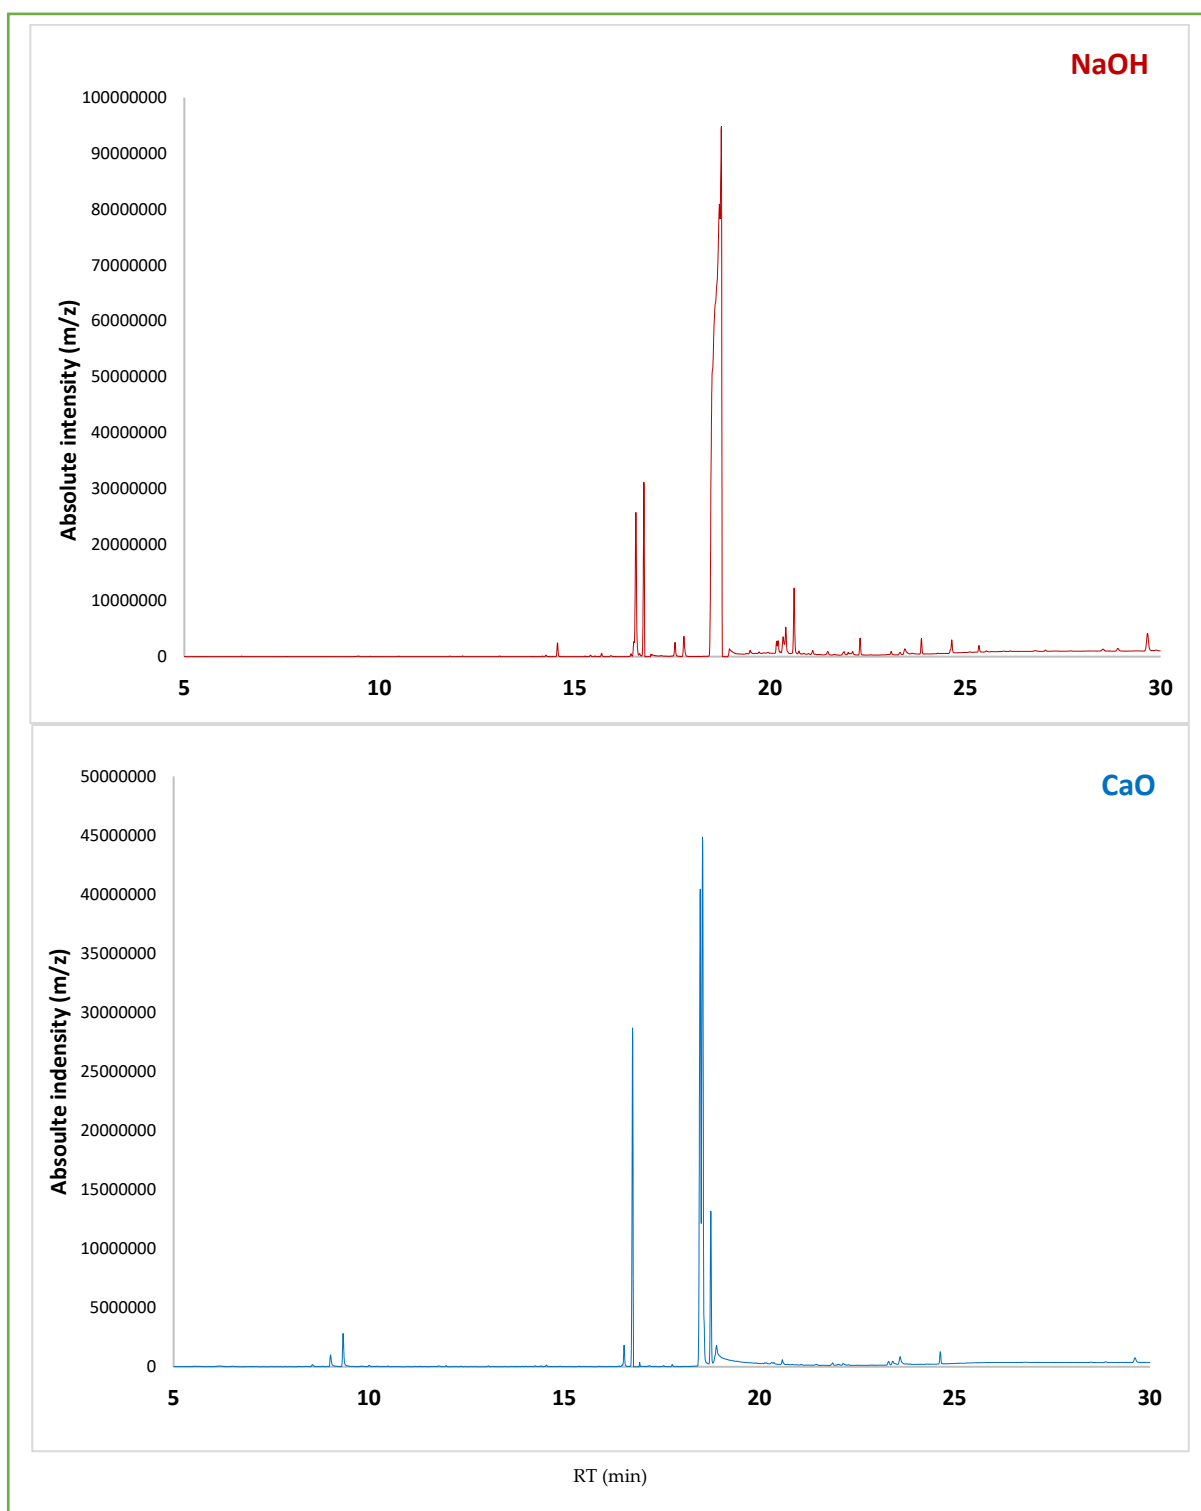

**Figure S6.** The GC-MS spectra of JCME use catalyst (a) CaO from mussel shell (b) NaOH.
